# Supplementary material for: Highly improved water tolerance of hydrogel fibers with a carbon nanotube sheath for rotational, contractile and elongational actuation
Source: Royal Society of Chemistry journal article supplement (doi:10.1039/d0ta11892c), 2021-01-01
Supplement: d0ta11892c1.pdf [file d0ta11892c1.pdf]

## ELECTRONIC SUPPLEMENTARY INFORMATION

### **Highly Improved Water Tolerance of Hydrogel Fibers by Carbon Nanotube Sheath for Rotational, Contractile and Elongational Actuation**

Chengwei You,<sup>‡ab</sup> Wenjing Qin,<sup>‡a</sup> Zhe Yan,<sup>‡ab</sup> Zhixin Ren,<sup>ab</sup> Jiayi Huang,<sup>b</sup> Jiatian Li,<sup>b</sup> Wang Chang,<sup>b</sup> Wenqian He,<sup>b</sup> Kai Wen,<sup>bcd</sup> Shougen Yin,<sup>\*a</sup> Xiang Zhou<sup>\*bcd</sup> and Zunfeng Liu<sup>\*b</sup>

<sup>a</sup>School of Materials Science and Engineering, Key Laboratory of Display Materials and Photoelectric Devices, Tianjin University of Technology, Tianjin, 300384, China.

<sup>b</sup>Key Laboratory of Functional Polymer Materials, College of Chemistry, State Key Laboratory of Medicinal Chemical Biology, Nankai University, Tianjin 300071, China.

<sup>c</sup>School of Chemical Engineering, University of Science and Technology Liaoning, Anshan, 114051, China.

<sup>d</sup>Department of Science, China Pharmaceutical University, Nanjing, Jiangsu, 211198, China.

<sup>‡</sup> These authors contributed equally to this work.

\* Corresponding authors E-mail: [liuzunfeng@nankai.edu.cn](mailto:liuzunfeng@nankai.edu.cn) (Z.L.), [zhouxiang@cpu.edu.cn](mailto:zhouxiang@cpu.edu.cn) (X.Z.), [sgyin@tjut.edu.cn](mailto:sgyin@tjut.edu.cn) (S.Y.)

#### **This file contains:**

Supplementary Figures S1 to S26

Supplementary Tables S1 to S2

Supplementary Captions for Movies S1 to S3

References for SI reference citations

#### **Other supplementary materials for this manuscript include the following:**

Supplementary Movies S1 to S3

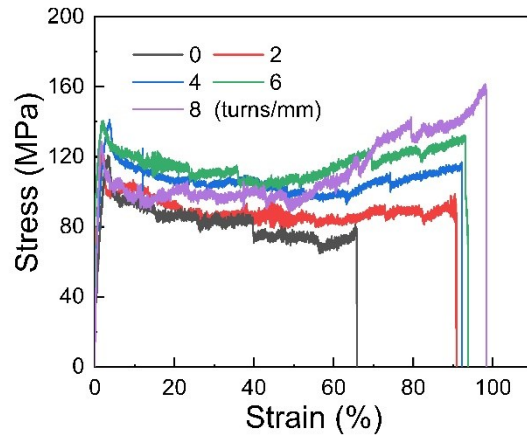

**Fig. S1.** The stress-strain curves for the hydrogel fiber with different twist density. The strain rate is 5 mm/s. The humidity is 20%.

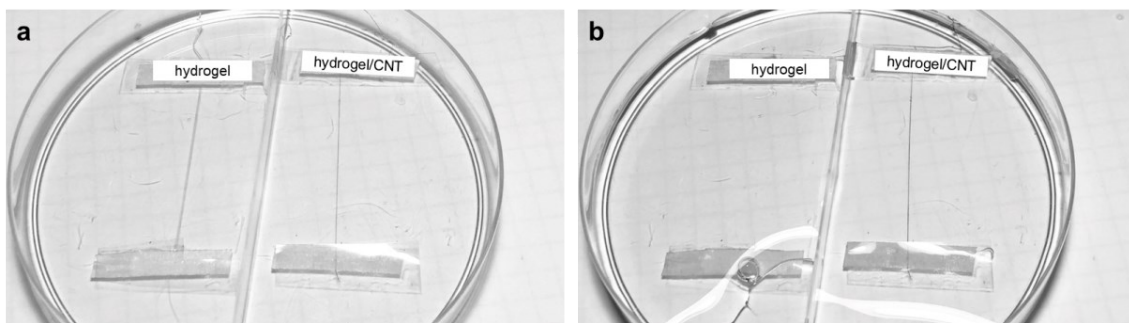

**Fig. S2.** A hydrogel fiber and A HF-ACNS<sub>0°</sub> fiber before and after soaking in water with both-end tethered. The hydrogel fiber broke due to supercontraction, and the HF-ACNS<sub>0°</sub> fiber did not break due to surface coating of carbon nanotube sheets.

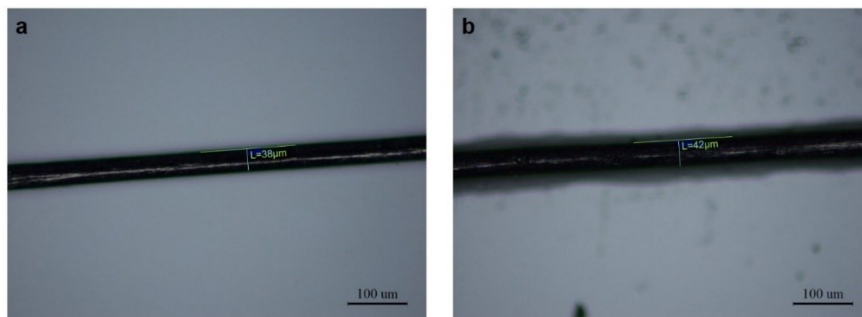

**Fig. S3.** Optical microscope images for the HF-ACNS<sub>0°</sub> fiber immersed in water for 15 hours. The diameter of the HF-ACNS<sub>0°</sub> fiber is (a) 38 μm and (b) 42 μm.

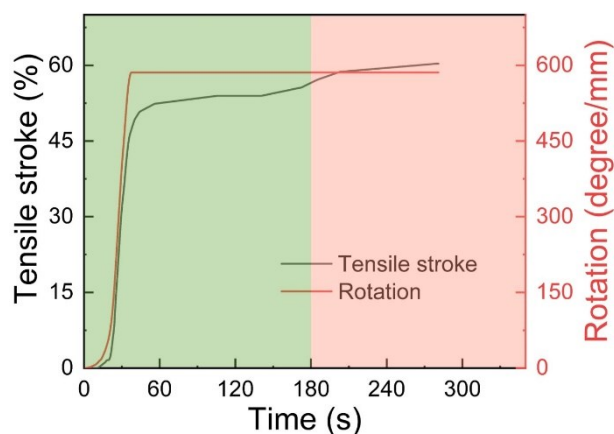

**Fig. S4.** Tensile stroke and rotation angle as a function of time for two-ply self-balanced hydrogel fibers during an actuation cycle driven by water fog. The twist density was 8 turns  $\text{mm}^{-1}$ , the diameter of the hydrogel fiber was 50  $\mu\text{m}$ , and the water fog flux was 28.8  $\text{g s}^{-1}$ .

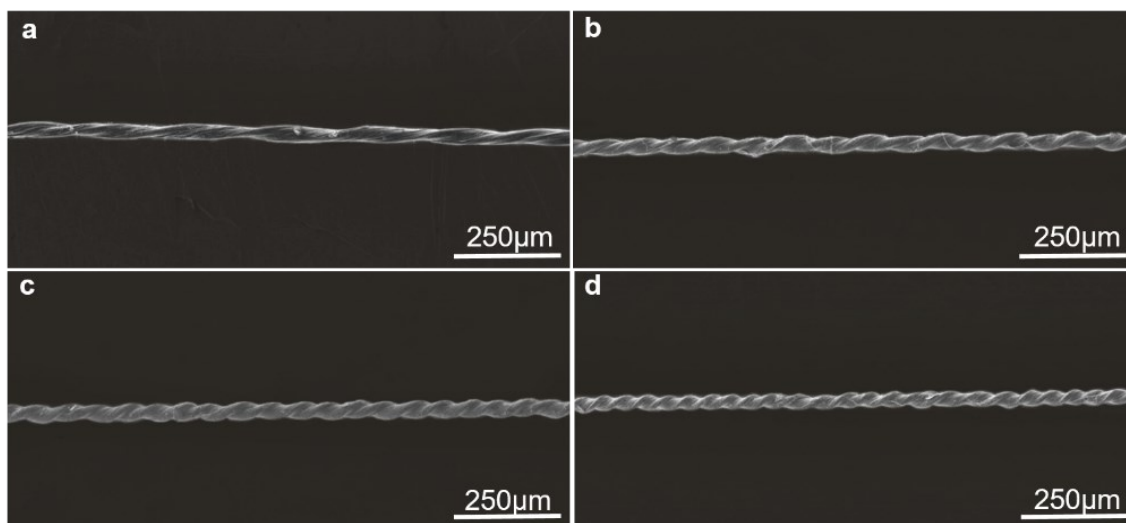

**Fig. S5.** SEM images for the HF-ACNS<sub>0°</sub> fibers with different twist densities. For a) to d), the twist densities are 2, 4, 6, and 8 turns  $\text{mm}^{-1}$ , respectively.

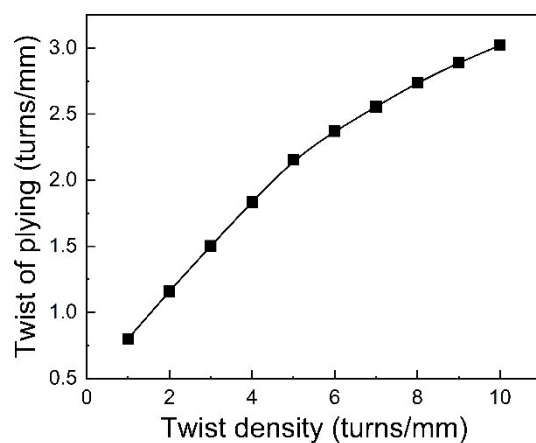

**Fig. S6.** Twist of plying as a function of inserted twist for a HF-ACNS<sub>0°</sub> fiber after twist insertion and folding in the middle point.

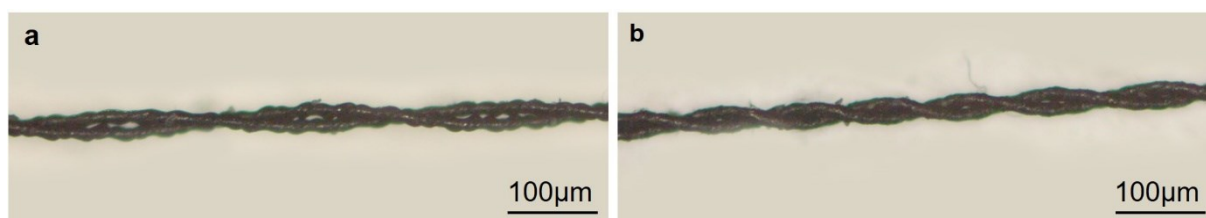

**Fig. S7.** Optical microscope images for the HF-ACNS<sub>0°</sub> muscle before and after exposure to ultrasonically-generated water fog. The twist density was 8 turns mm<sup>-1</sup>, the diameter of the hydrogel fiber was 25 µm, the isobaric load was 0.61 MPa, and the water fog flux was 28.8 g s<sup>-1</sup>.

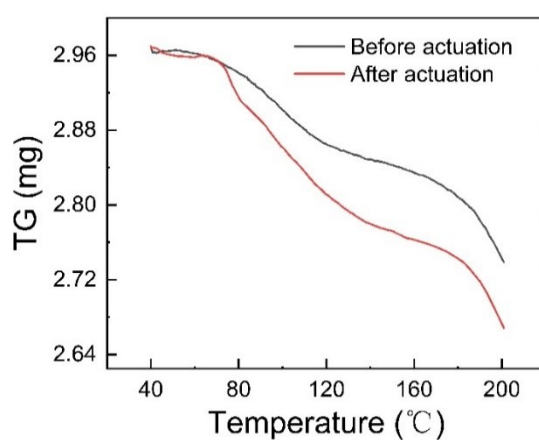

**Fig. S8.** Thermal gravimetric analysis in N<sub>2</sub> atmosphere for the HF-ACNS<sub>0°</sub> muscle before and after one cycle of actuation.

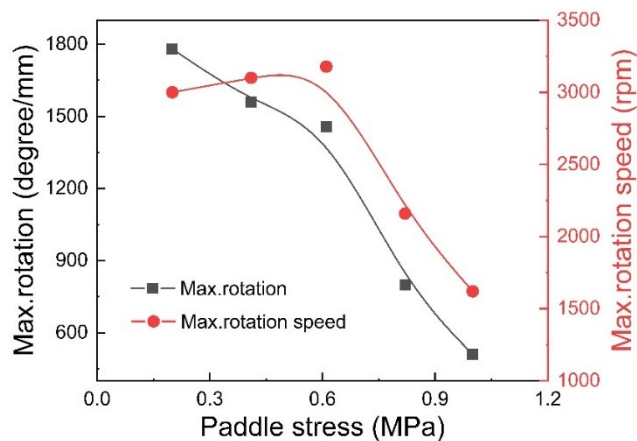

**Fig. S9.** Maximum rotation angle and maximum rotational speed as a function of isobaric load for the HF-ACNS<sub>0</sub> muscle on exposure to ultrasonically-generated water fog. The twist density was 8 turns mm<sup>-1</sup>, the diameter of the hydrogel fiber was 25 μm, and the water fog flux was 28.8 g s<sup>-1</sup>.

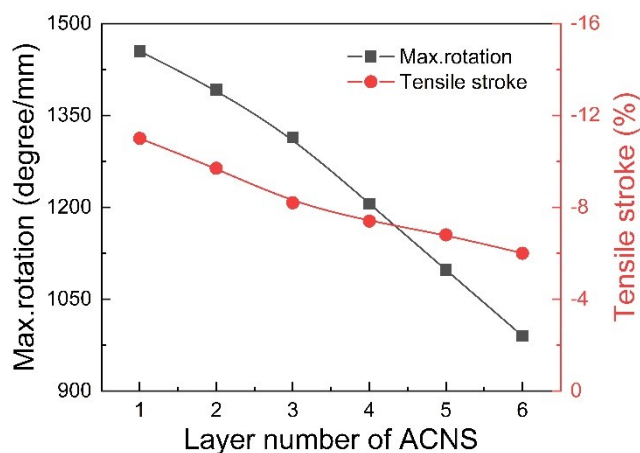

**Fig. S10.** Maximum rotation angle and maximum tensile stroke as a function of number of layers of ACNS for the HF-ACNS<sub>0</sub> muscle on exposure to ultrasonically-generated water fog. The twist density was 8 turns mm<sup>-1</sup>, the diameter of the hydrogel fiber was 25 μm, and the water fog flux was 28.8 g s<sup>-1</sup>.

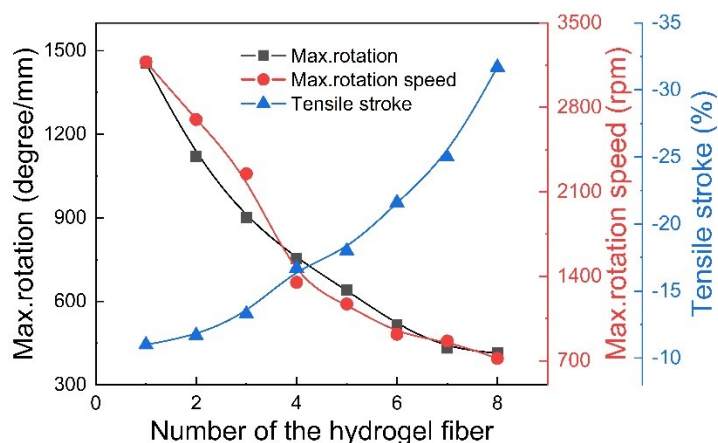

**Fig. S11.** Maximum rotation angle, maximum rotational speed and tensile stroke as a function of number of the hydrogel fibers used for preparing the HF-ACNS<sub>0°</sub> muscle on exposure to ultrasonically-generated water fog. The twist density was 8 turns mm<sup>-1</sup>, the diameter of the hydrogel fiber was 25 μm, and the water fog flux was 28.8 g s<sup>-1</sup>.

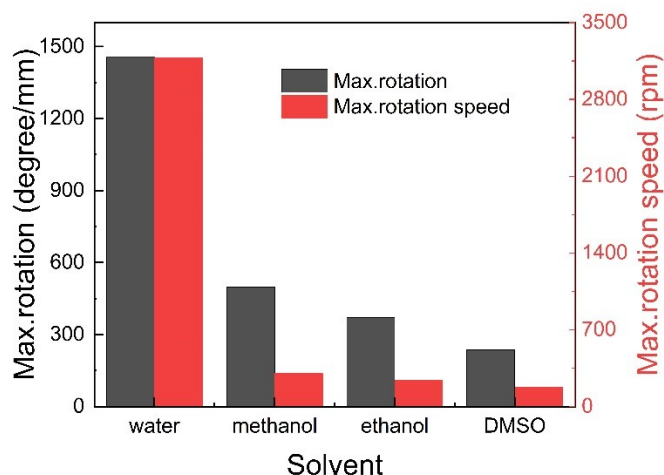

**Fig. S12.** Maximum rotation angle and maximum rotational speed for the HF-ACNS<sub>0°</sub> muscle on exposure to different ultrasonically-generated vapors including water, methanol, ethanol, and dimethyl sulfoxide. The twist density was 8 turns mm<sup>-1</sup>, the diameter of the hydrogel fiber was 25 μm, and the same power was used to generate the fog as water (28.8 g s<sup>-1</sup>).

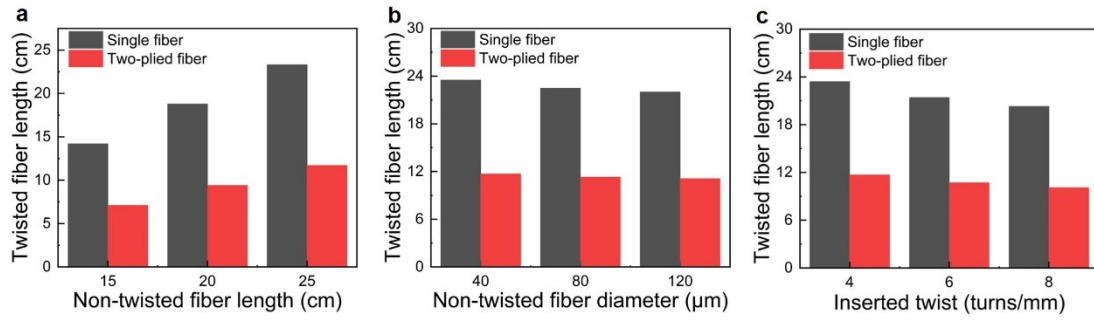

**Fig. S13.** The length of the plied yarn as a function of the individual fiber length (a), the individual fiber diameter (b), and inserted twist. The fiber twist density in (a) and (b) was 4 turns/mm, the fiber length in (b) and (c) was 25 cm, and the fiber diameter of (a) and (c) was 30  $\mu\text{m}$ .

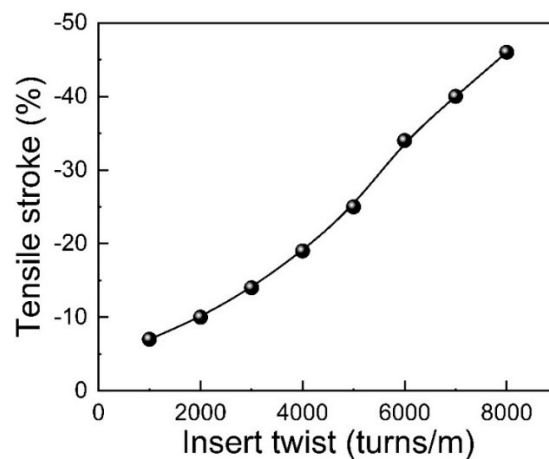

**Fig. S14.** Maximum tensile stroke as a function of different inserted twist for the HF-ACNS<sub>0°</sub> muscle on exposure to ultrasonically-generated water fog with the paddle torsionally tethered. The diameter of the hydrogel fiber was 25  $\mu\text{m}$ , the isobaric load of the muscle was 0.61 MPa, and the water fog flux was 28.8  $\text{g s}^{-1}$ .

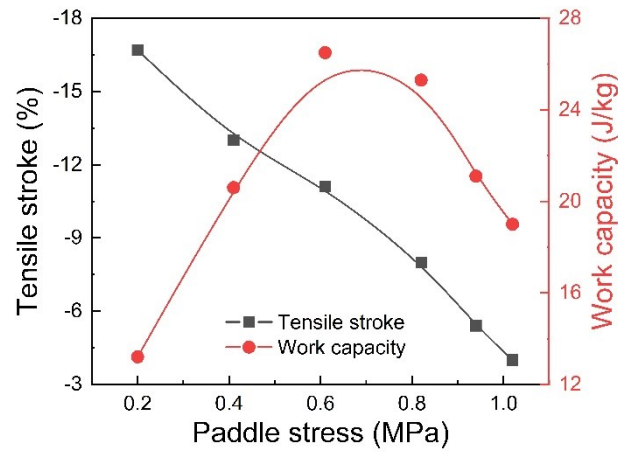

**Fig. S15.** Maximum tensile stroke and work capacity as a function of isobaric load for the HF-ACNS<sub>0°</sub> muscle on exposure to ultrasonically-generated water fog. The twist density was 8 turns mm<sup>-1</sup>, the diameter of the hydrogel fiber was 25 μm, and the water fog flux was 28.8 g s<sup>-1</sup>. The paddle was torsionally tethered.

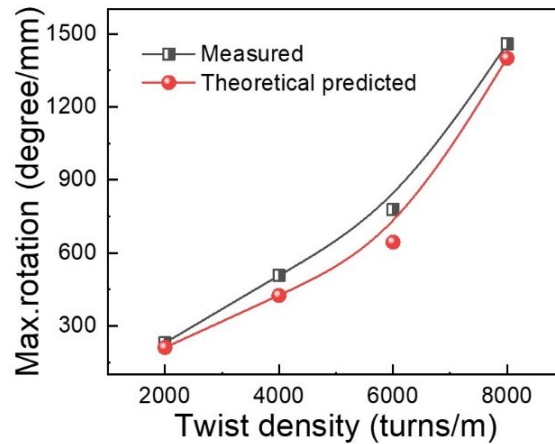

**Fig. S16.** Measured and theoretically predicted maximum rotation angle as a function of different inserted twist for the HF-ACNS<sub>0°</sub> muscle on exposure to ultrasonically-generated water fog. The diameter of the hydrogel fiber was 25 μm, the isobaric load of the muscle was 0.61 MPa, and the water fog flux was 28.8 g s<sup>-1</sup>.



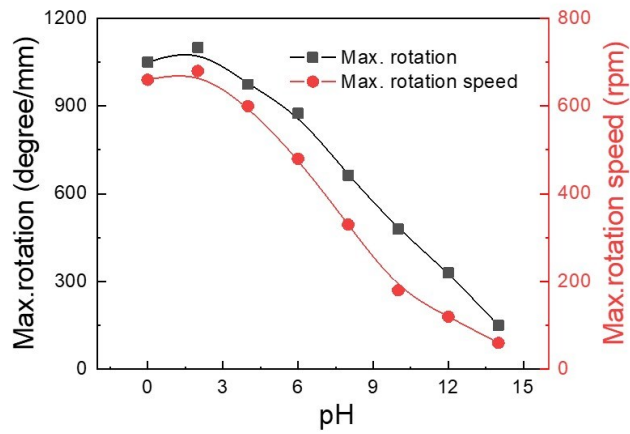

**Fig. S17.** Maximum rotation angle and maximum rotational speed for the HF-ACNS<sub>90°</sub> muscle on exposure to ultrasonically-generated water fog as a function of pH. The twist density was 8 turns mm<sup>-1</sup>, the diameter of the hydrogel fiber was 25 μm, and the water fog flux was 28.8 g s<sup>-1</sup>.

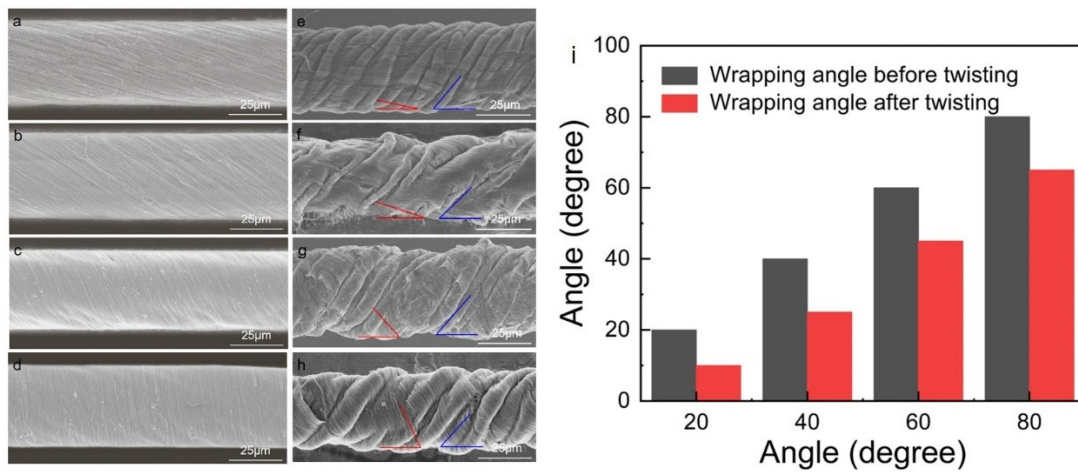

**Fig. S18.** (a-h) SEM images and (i) bias angle for the (a-d) non-twisted and (e-h) twisted HF-ACNS<sub>20°-80°</sub> fibers with different wrapping angles.

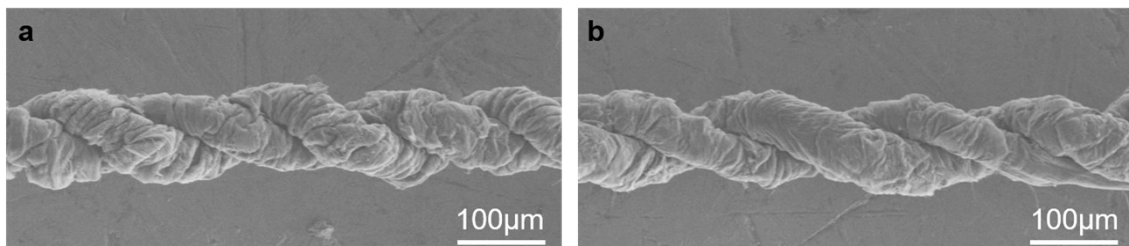

**Fig. S19.** SEM images for the HF-ACNS<sub>90°</sub> muscles before and after exposure to ultrasonically-generated water fog. The twist density was 8 turns mm<sup>-1</sup>, the diameter of the hydrogel fiber was 25 μm, and the water fog flux was 28.8 g s<sup>-1</sup>.

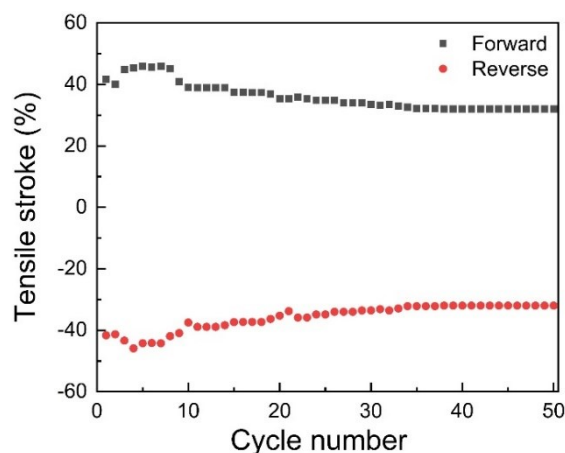

**Fig. S20.** Maximum tensile stroke as a function of cycle number for the HF-ACNS<sub>90°</sub> muscle on exposure to ultrasonically-generated water fog. The twist density was 8 turns mm<sup>-1</sup>, the diameter of the hydrogel fiber was 25 μm, and the water fog flux was 28.8 g s<sup>-1</sup>.

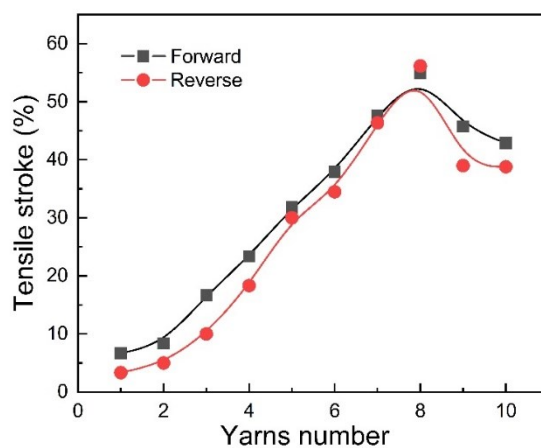

**Fig. S21.** Maximum strain as a function of number of the hydrogel fiber used for preparing the HF-ACNS<sub>90°</sub> muscle on exposure to ultrasonically-generated water fog. The twist density was 8 turns mm<sup>-1</sup>, the diameter of the hydrogel fiber was 25 μm, and the water fog flux was 28.8 g s<sup>-1</sup>.

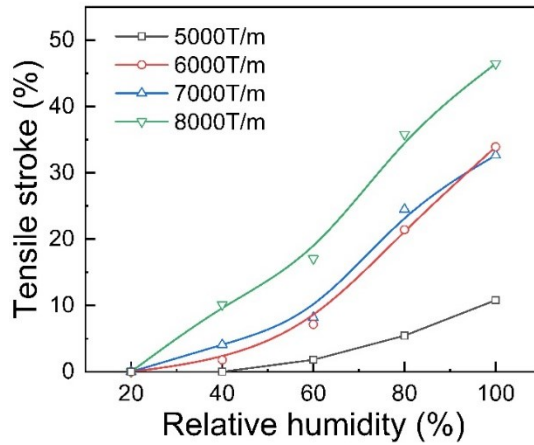

**Fig. S22.** Maximum tensile stroke as a function of relative humidity for the HF-ACNS<sub>90°</sub> muscles with different inserted twist, with the paddle torsionally tethered. The diameter of the hydrogel fiber was 25  $\mu\text{m}$ , and the isobaric load of the muscle was 0.61 MPa.

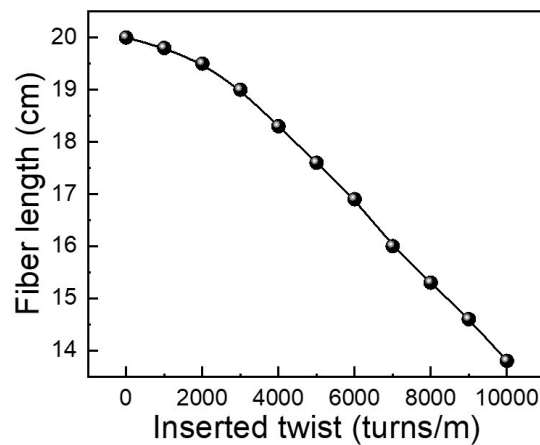

**Fig. S23.** Fiber length as a function of inserted twist for the HF-ACNS<sub>0°</sub> fibers. The diameter of the HF-ACNS<sub>0°</sub> fiber was 25  $\mu\text{m}$ , the relative humidity was 20%.

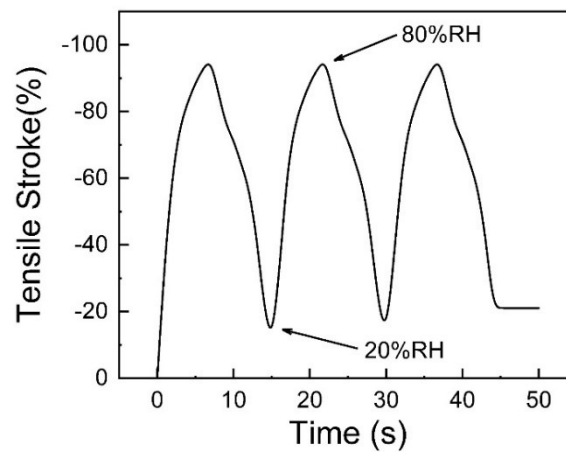

**Fig. S24.** Tensile actuation stroke as a function of time for a homochiral (ZZ) HF-ACNS<sub>0°</sub> coil on exposure to relative humidity of 80%. The twist density was 6 turns mm<sup>-1</sup>, the diameter of the hydrogel fiber was 25 μm, the spring index was 15, the coil pitch was 1 mm, and the relative humidity was 80%. The coil muscle was non-loaded.

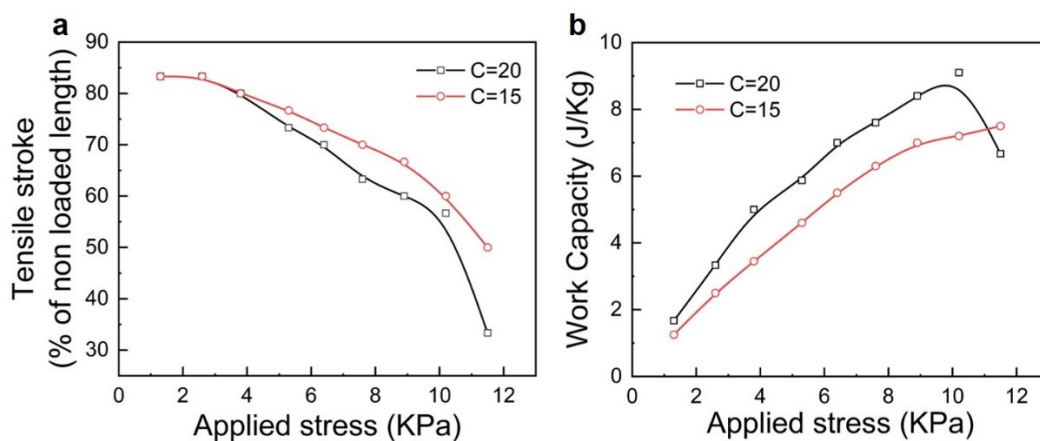

**Fig. S25.** (a) Tensile actuation stroke and (b) work capacity as a function of applied stress for homochiral HF-ACNS<sub>0°</sub> coils with different spring index on exposure to ultrasonically-generated water fog. The twist density was 6 turns mm<sup>-1</sup>, the diameter of the hydrogel fiber was 25 μm, the coil pitch was 1 mm, and the relative humidity was 80%.

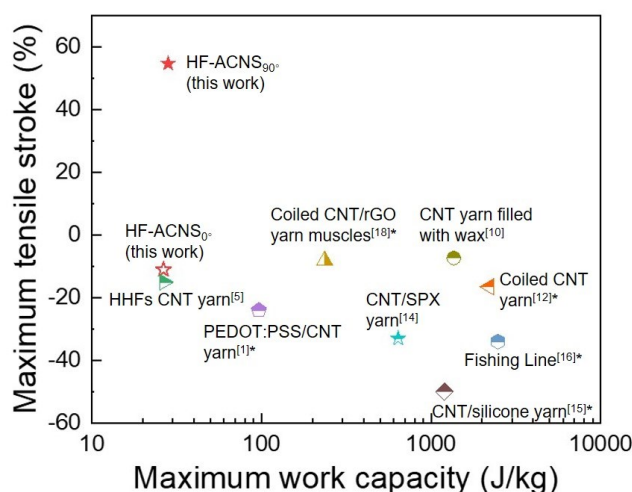

**Fig. S26.** Comparison of the tensile actuation performance of HF-ACNS<sub>x</sub> muscles in this paper with typical fiber artificial muscles reported in literatures. The detailed data are shown in Table S2.

**Table S1.** Comparison of the torsional actuation performance of HF-ACNS<sub>x</sub> muscles in this paper with typical fiber artificial muscles reported in literatures.

| Material                                                               | Stimulation     | Torsional rotate (degree·mm <sup>-1</sup> ) | Normalized torsional rotate (degree·μm mm <sup>-1</sup> ) | Torsional speed (rpm) | fractional rotation (degree/tu rns mm <sup>-1</sup> ) |
|------------------------------------------------------------------------|-----------------|---------------------------------------------|-----------------------------------------------------------|-----------------------|-------------------------------------------------------|
| HF-ACNS <sub>0°</sub> muscle (this work)                               | water           | 1455                                        | 51434                                                     | 3178                  | 9712                                                  |
| HF-ACNS <sub>90°</sub> muscle (this work)                              | water           | 501                                         | 35442                                                     | 720                   | 5198                                                  |
| PEDOT:PSS/CNT yarn <sup>[1]</sup>                                      | water           | 1340                                        | 40200                                                     | 1395                  | 3453                                                  |
| Oxygen plasma treated CNT yarn <sup>[2]</sup>                          | water           | 61.3                                        | 2452                                                      | 750                   | —                                                     |
| Twisted Graphene hydrogel fiber <sup>[3]</sup>                         | water           | 588                                         | 38220                                                     | 5190                  | 23250                                                 |
| Silkworm silk muscle <sup>[4]</sup>                                    | water           | 547                                         | 14696                                                     | 1125                  | 6078                                                  |
| HHFs CNT yarn <sup>[5]</sup>                                           | alcohol         | 738                                         | 47970                                                     | 6361                  | —                                                     |
| CNT yarn treated with ITAP <sup>[6]</sup>                              | acetone         | 52                                          | 5200                                                      | 160                   | 58.4                                                  |
| CNT Yarn deposited with HC-BA NG <sup>[7]</sup>                        | glucose         | 40                                          | 1200                                                      | <0.5                  | 1429                                                  |
| CNT yarn filled with wax and SEBS <sup>[8]</sup>                       | electro-thermal | 80                                          | 1500                                                      | 9800                  | 1404                                                  |
| CNT yarn filled with PVA/H <sub>2</sub> SO <sub>4</sub> <sup>[9]</sup> | electricity     | 53                                          | 1537                                                      | 2330                  | 18.7                                                  |
| CNT yarn filled with wax <sup>[10]</sup>                               | electro-thermal | 17.4                                        | 174                                                       | 11500                 | 54.6                                                  |
| CNT yarn <sup>[11]</sup>                                               | electricity     | 125                                         | 1500                                                      | 590                   | 674                                                   |

HHFs: hierarchically arranged helical fibers; ITAP: incandescent tension annealing process; HC-BA NG: boronic acid-conjugated hyaluronic acid/cholesterol nanogel; SEBS: polystyrene-poly(ethylene-butylene)-polystyrene; PVA: polyvinyl alcohol.

**Table S2.** Comparison of the tensile actuation performance of HF-ACNS<sub>x</sub> muscles in this paper with typical fiber artificial muscles reported in literatures.

| Material                                  | Diameter (μm) | Maximum tensile stroke (%) | Torsionally tethered | Maximum work capacity (J kg <sup>-1</sup> ) |
|-------------------------------------------|---------------|----------------------------|----------------------|---------------------------------------------|
| HF-ACNS <sub>0°</sub> muscle (this work)  | 25            | -11 / -46                  | no / yes             | 26.5                                        |
| HF-ACNS <sub>90°</sub> muscle (this work) | 70            | 54.8 / 52                  | no / yes             | 28.2                                        |
| PEDOT:PSS/CNT yarn [1]                    | 30            | -24* / -68*                | no / yes             | 96.9                                        |
| Twisted Graphene hydrogel fiber [2]       | 62            | 4.7                        | no                   | —                                           |
| Silkworm silk [4]                         | 82            | -70*                       | no                   | 73                                          |
| HHFs CNT yarn [5]                         | 65            | -15 / -59*                 | no                   | —                                           |
| CNT yarn filled with wax [10]             | 115           | -7.3                       | no                   | 1360                                        |
| CNT yarn [11]                             | 12            | -1                         | no                   | —                                           |
| Coiled CNT yarn [12]                      | 300           | -16.5*                     | no                   | 2200                                        |
| CNT yarn filled with PDDA [13]            | 67            | -78*                       | no                   | 2170                                        |
| CNT/SPX yarn [14]                         | —             | -33                        | no                   | 640                                         |
| CNT/silicone yarn [15]                    | 500           | -50*                       | no                   | 1200                                        |
| Fishing Line [16]                         | 127           | -34*                       | no                   | 2480                                        |
| Coiled GO/Nylon fiber [17]                | 76            | -80* / 75*                 | no                   | —                                           |
| Coiled CNT/rGO yarn muscles [18]          | 58            | -8.1*                      | no                   | 236                                         |

\*The samples were coiled or self-coiled.

GO: graphene oxide; PDDA: poly(diallyldimethylammonium chloride); SPX spandex; rGO: reduced graphene oxide.

### **Movie captions:**

**Movie S1.** Comparison of water resistance properties of pure hydrogel fiber and the HF-ACNS<sub>0°</sub> fiber. On the left side of the culture dish is a 50- $\mu$ m-diameter hydrogel fiber, and on the right side of the culture dish is a HF-ACNS<sub>0°</sub> fiber. The hydrogel fiber broke upon immersion in water, while the HF-ACNS<sub>0°</sub> fiber did not break in water. The HF-ACNS<sub>0°</sub> fiber were prepared by coating one layer of CNT sheet (sheet width of 0.5 cm) on a 50- $\mu$ m hydrogel fiber.

**Movie S2.** Hygromorph torsional and contractile actuation of the twisted, two ply HF-ACNS<sub>0°</sub> fiber, which was driven by water fog. The twist density was 8 turns mm<sup>-1</sup>, the diameter of the hydrogel fiber was 25  $\mu$ m, and the water fog flux was 28.8 g s<sup>-1</sup>.

**Movie S3.** Hygromorph torsional and elongational actuation of the twisted HF-ACNS<sub>90°</sub> fibers that was assembled from 8 plies of 25- $\mu$ m-diameter hydrogel fiber with water fog. The twist density was 8 turns mm<sup>-1</sup>, and the water fog flux was 28.8 g s<sup>-1</sup>.

### **References**

- 1 X. Gu, Q. Fan, F. Yang, L. Cai, N. Zhang, W. Zhou, W. Zhou and S. Xie, *Nanoscale*, 2016, **8**, 17881-17886.
- 2 S. He, P. Chen, L. Qiu, B. Wang, X. Sun, Y. Xu and H. Peng, *Angew. Chem.*, 2015, **127**, 15093-15097.
- 3 H. Cheng, Y. Hu, F. Zhao, Z. Dong, Y. Wang, N. Chen, Z. Zhang and L. Qu, *Adv. Mater.*, 2014, **26**, 2909-2913.

- 4 T. Jia, Y. Wang, Y. Dou, Y. Li, M. Jung de Andrade, R. Wang, S. Fang, J. Li, Z. Yu, R. Qiao, Z. Liu, Y. Cheng, Y. Su, M. Minary-Jolandan, R. H. Baughman, D. Qian and Z. Liu, *Adv. Funct. Mater.*, 2019, **29**, 1808241.
- 5 P. Chen, Y. Xu, S. He, X. Sun, S. Pan, J. Deng, D. Chen and H. Peng, *Nat. Nanotechnol.*, 2015, **10**, 1077-1083.
- 6 J. Di, S. Fang, F. A. Moura, D. S. Galvao, J. Bykova, A. Aliev, M. J. de Andrade, X. Lepro, N. Li, C. Haines, R. Ovalle-Robles, D. Qian and R. H. Baughman, *Adv. Mater.* 2016, **28**, 6598-6605.
- 7 J. Lee, S. Ko, C. H. Kwon, M. D. Lima, R. H. Baughman and S. J. Kim, *Small*, 2016, **12**, 2085-2091.
- 8 K. Y. Chun, S. Hyeong Kim, M. Kyoon Shin, C. Hoon Kwon, J. Park, Y. Tae Kim, G. M. Spinks, M. D. Lima, C. S. Haines, R. H. Baughman and S. Jeong Kim, *Nat. Commun.* 2014, **5**, 3322.
- 9 J. A. Lee, Y. T. Kim, G. M. Spinks, D. Suh, X. Lepro, M. D. Lima, R. H. Baughman and S. J. Kim, *Nano Lett.* 2014, **14**, 2664-2669.
- 10 M. D. Lima, N. Li, M. Jung de Andrade, S. Fang, J. Oh, G. M. Spinks, M. E. Kozlov, C. S. Haines, D. Suh, J. Foroughi, S. J. Kim, Y. Chen, T. Ware, M. K. Shin, L. D. Machado, A. F. Fonseca, J. D. Madden, W. E. Voit, D. S. Galvao and R. H. Baughman, *Science*, 2012, **338**, 928-932.
- 11 J. Foroughi, G. M. Spinks, G. G. Wallace, J. Oh, M. E. Kozlov, S. Fang, T. Mirfakhrai, J. D. Madden, M. K. Shin, S. J. Kim and R. H. Baughman, *Science*, 2011, **334**, 494-497.
- 12 J. A. Lee, N. Li, C. S. Haines, K. J. Kim, X. Lepro, R. Ovalle-Robles, S. J. Kim and R. H. Baughman, *Adv. Mater.*, 2017, **29**, 1700870.
- 13 S. H. Kim, C. H. Kwon, K. Park, T. J. Mun, X. Lepro, R. H. Baughman, G. M. Spinks and S. J. Kim, *Sci. Rep.*, 2016, **6**, 23016.
- 14 J. Foroughi, G. M. Spinks, S. Aziz, A. Mirabedini, A. Jeiranikhameneh, G. G. Wallace, M. E. Kozlov and R. H. Baughman, *ACS Nano*, 2016, **10**, 9129-9135.
- 15 M. D. Lima, M. W. Hussain, G. M. Spinks, S. Naficy, D. Hagenasr, J. S. Bykova, D. Tolly and R. H. Baughman, *Small* 2015, **11**, 3113-8.
- 16 C. S. Haines, M. D. Lima, N. Li, G. M. Spinks, J. Foroughi, J. D. W. Madden, S. H. Kim, S. Fang, M. Jung de Andrade, F. Göktepe, Ö. Göktepe, S. M. Mirvakili, S. Naficy, X. Lepró, J. Oh, M. E. Kozlov, S. J. Kim, X. Xu, B. J. Swedlove, G. G. Wallace and R. H. Baughman, *Science*, 2014, **343**, 868-872.



17 H. Kim, J. H. Moon, T. J. Mun, T. G. Park, G. M. Spinks, G. G. Wallace and S. J. Kim, *ACS Appl. Mater. Interfaces*, 2018, **10**, 32760.

18 J. Qiao, J. Di, S. Zhou, K. Jin, S. Zeng, N. Li, S. Fang, Y. Song, M. Li, R. H. Baughman and Q. Li, *Small*, 2018, **14**, 1801883.
